# Supplementary material for: Structure–property correlations in piracetam polytypes
Source: Royal Society of Chemistry journal article supplement (doi:10.1039/d0ce01694b), 2020-12-23
Supplement: d0ce01694b3.pdf [file d0ce01694b3.pdf]

## Structure-property correlations in piracetam polytypes

Pratik P. Upadhyay, Manish Kumar Mishra, Upadrasta Ramamurty, Andrew D. Bond

Electronic Supplementary Information

# Structure-property correlations in piracetam polytypes

*Pratik P. Upadhyay, Manish Kumar Mishra, Upadrasta Ramamurty and Andrew D. Bond\**

\*E-mail: [adb29@cam.ac.uk](mailto:adb29@cam.ac.uk)

### S1. Comparison of experimental and simulated PXRD patterns for piracetam bulk phases

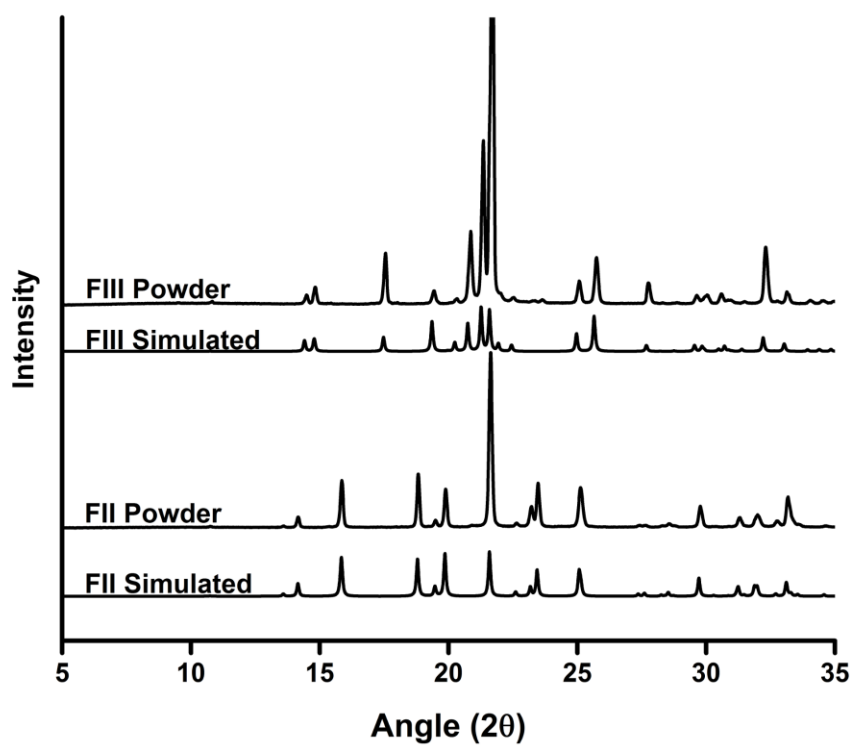

## Structure-property correlations in piracetam polytypes

Pratik P. Upadhyay, Manish Kumar Mishra, Upadrasta Ramamurty, Andrew D. Bond

Electronic Supplementary Information

### S2. PIXEL calculations: FII (CSD: BISMEV11, space group $P-1$ , transformed using the matrix [ 1 0 0, 0 -1 0, 0 0 -1 ])

**Unit cell:** a = 6.353, b = 6.528, c = 8.372 Å, alpha = 80.30, beta = 101.77, gamma = 90.95°

**Symmetry operators:** [1] x, y, z [2] -x, -y, -z

Shaded rows indicate interactions between polytypic layers. Only interactions with magnitude > 3 kJ mol<sup>-1</sup> are listed.

| Mol 1 ARU | Mol 2 ARU | Mol 1 Operator | Mol 2 Operator | Distance | Coulomb | Polarisation | Dispersion | Repulsion | Total |
|-----------|-----------|----------------|----------------|----------|---------|--------------|------------|-----------|-------|
| 1_555_01  | 2_456_01  | x,y,z          | -1-x,-y,1-z    | 7.856    | -98.5   | -34.0        | -20.0      | 90.4      | -62.2 |
| 1_555_01  | 1_655_01  | x,y,z          | 1+x,y,z        | 6.353    | -47.5   | -16.4        | -21.3      | 43.5      | -41.6 |
| 1_555_01  | 1_455_01  | x,y,z          | -1+x,y,z       | 6.353    | -47.5   | -16.4        | -21.3      | 43.5      | -41.6 |
| 1_555_01  | 2_567_01  | x,y,z          | -x,1-y,2-z     | 4.698    | -16.7   | -7.5         | -34.5      | 28.9      | -29.8 |
| 1_555_01  | 2_557_01  | x,y,z          | -x,-y,2-z      | 6.288    | -28.0   | -9.8         | -12.2      | 21.0      | -29.1 |
| 1_555_01  | 2_566_01  | x,y,z          | -x,1-y,1-z     | 5.120    | -17.6   | -7.7         | -21.1      | 19.0      | -27.4 |
| 1_555_01  | 2_466_01  | x,y,z          | -1-x,1-y,1-z   | 5.216    | -4.6    | -2.8         | -18.3      | 9.6       | -16.1 |
| 1_555_01  | 1_545_01  | x,y,z          | x,-1+y,z       | 6.528    | -4.4    | -3.6         | -14.5      | 11.6      | -10.9 |
| 1_555_01  | 1_565_01  | x,y,z          | x,1+y,z        | 6.528    | -4.4    | -3.6         | -14.5      | 11.6      | -10.9 |
| 1_555_01  | 2_457_01  | x,y,z          | -1-x,-y,2-z    | 7.801    | -2.2    | -1.6         | -5.0       | 0.7       | -8.2  |
| 1_555_01  | 2_667_01  | x,y,z          | 1-x,1-y,2-z    | 8.949    | -3.7    | -0.5         | -1.5       | 0.0       | -5.7  |
| 1_555_01  | 1_645_01  | x,y,z          | 1+x,-1+y,z     | 9.184    | -3.0    | -0.2         | -0.3       | 0.0       | -3.5  |
| 1_555_01  | 1_465_01  | x,y,z          | -1+x,1+y,z     | 9.184    | -3.0    | -0.2         | -0.3       | 0.0       | -3.5  |
| 1_555_01  | 2_556_01  | x,y,z          | -x,-y,1-z      | 7.880    | 8.8     | -0.6         | -0.9       | 0.0       | +7.3  |
| 1_555_01  | 2_657_01  | x,y,z          | 1-x,-y,2-z     | 9.947    | 8.6     | -0.4         | -0.3       | 0.0       | +8.0  |

## Structure-property correlations in piracetam polytypes

Pratik P. Upadhyay, Manish Kumar Mishra, Upadrasta Ramamurty, Andrew D. Bond

Electronic Supplementary Information

### S2. PIXEL calculations: FIII (CSD: BISMEV12, space group P2<sub>1</sub>/n)

**Unit cell:** a = 6.454, b = 6.386, c = 16.181 Å, alpha = 90, beta = 92.06, gamma = 90°

**Symmetry operators:** [1] x, y, z [2] 0.5-x,0.5+y,0.5-z [3] -x, -y, -z [4] 0.5+x,0.5-y,0.5+z

Shaded rows indicate interactions between polytypic layers. Only interactions with magnitude > 3 kJ mol<sup>-1</sup> are listed.

| Mol 1 ARU | Mol 2 ARU | Mol 1 Operator | Mol 2 Operator     | Distance | Coulomb | Polarisation | Dispersion | Repulsion | Total |
|-----------|-----------|----------------|--------------------|----------|---------|--------------|------------|-----------|-------|
| 1_555_01  | 3_565_01  | x,y,z          | -x,1-y,-z          | 7.851    | -101.9  | -35.7        | -20.4      | 92.3      | -65.8 |
| 1_555_01  | 1_655_01  | x,y,z          | 1+x,y,z            | 6.454    | -47.5   | -17.1        | -21.5      | 44.8      | -41.3 |
| 1_555_01  | 1_455_01  | x,y,z          | -1+x,y,z           | 6.454    | -47.5   | -17.1        | -21.5      | 44.8      | -41.3 |
| 1_555_01  | 3_655_01  | x,y,z          | 1-x,-y,-z          | 5.124    | -18.3   | -8.2         | -21.1      | 19.5      | -28.1 |
| 1_555_01  | 2_545_01  | x,y,z          | 0.5-x,-0.5+y,0.5-z | 5.176    | -17.5   | -6.3         | -22.4      | 19.3      | -27.0 |
| 1_555_01  | 2_555_01  | x,y,z          | 0.5-x,0.5+y,0.5-z  | 5.176    | -17.5   | -6.3         | -22.4      | 19.3      | -27.0 |
| 1_555_01  | 3_555_01  | x,y,z          | -x,-y,-z           | 5.258    | -5.9    | -3.0         | -18.9      | 11.1      | -16.7 |
| 1_555_01  | 1_545_01  | x,y,z          | x,-1+y,z           | 6.386    | -6.2    | -4.4         | -15.9      | 14.6      | -11.9 |
| 1_555_01  | 1_565_01  | x,y,z          | x,1+y,z            | 6.386    | -6.2    | -4.4         | -15.9      | 14.6      | -11.9 |
| 1_555_01  | 1_445_01  | x,y,z          | -1+x,-1+y,z        | 9.079    | -3.1    | -0.2         | -0.3       | 0.0       | -3.7  |
| 1_555_01  | 1_665_01  | x,y,z          | 1+x,1+y,z          | 9.079    | -3.1    | -0.2         | -0.3       | 0.0       | -3.7  |
| 1_555_01  | 3_665_01  | x,y,z          | 1-x,1-y,-z         | 7.762    | 9.6     | -0.7         | -0.9       | 0.0       | +8.0  |

## Structure-property correlations in piracetam polytypes

Pratik P. Upadhyay, Manish Kumar Mishra, Upadrasta Ramamurty, Andrew D. Bond

Electronic Supplementary Information

---

### S3. Face identification of single crystals

Major faces for indentation were identified by morphology analysis on the single-crystal X-ray diffractometer (*APEX3* software package, Bruker AXS). SEM images were collected to correlate the identified faces with the crystal morphology in bulk samples. Crystals of FIII display a plate-like morphology, so only the major face  $\{001\}$  is available for nanoindentation. Crystals of FII have a more block-like shape, and both  $\{001\}$  and  $\{10\bar{1}\}$  faces are available for nanoindentation.

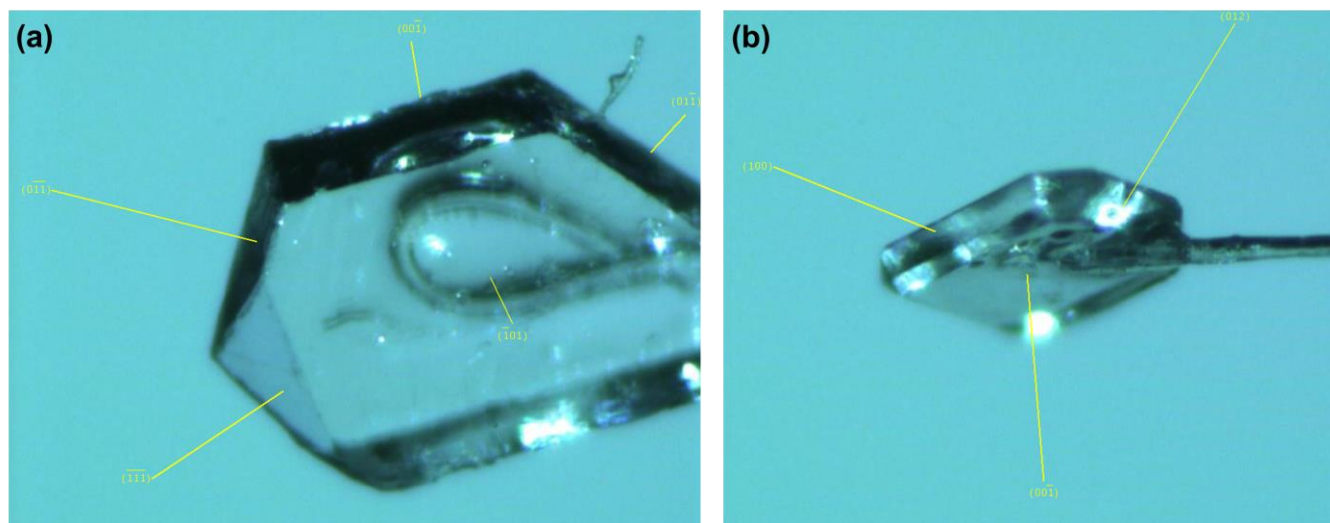

**Face indexed crystals:** (a)  $\{001\}$  and  $\{10\bar{1}\}$  face of FII; (b)  $\{001\}$  face of FIII

## Structure-property correlations in piracetam polytypes

Pratik P. Upadhyay, Manish Kumar Mishra, Upadrasta Ramamurty, Andrew D. Bond

Electronic Supplementary Information

### S5. AFM images following nanoindentation

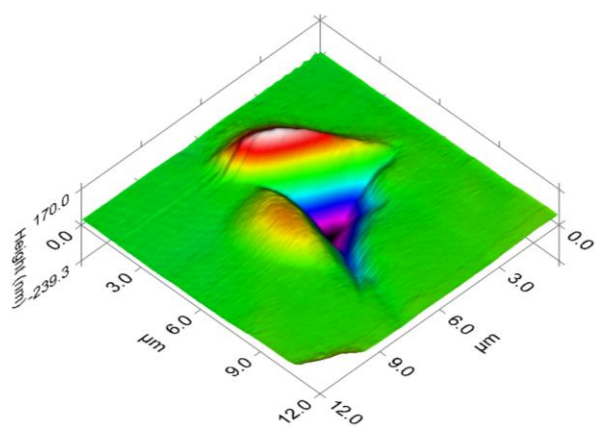

**FII {001}**

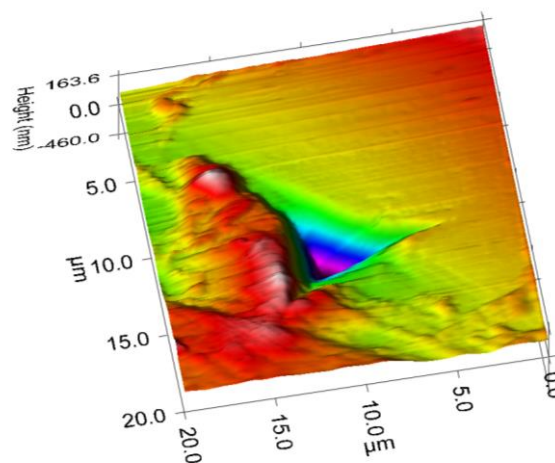

**FII {10-1}**

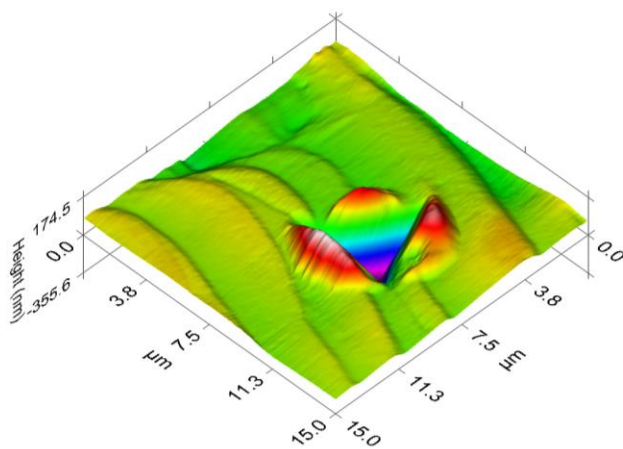

**FIII {001}**

## Structure-property correlations in piracetam polytypes

Pratik P. Upadhyay, Manish Kumar Mishra, Upadrasta Ramamurty, Andrew D. Bond

Electronic Supplementary Information

### S6. Thermal expansion measurements

Unit-cell parameters ( $\text{\AA}$ ,  $^\circ$ ) were measured over the range *ca* 100–300 K at for single crystals.

| FII | T (K) | a     | b     | c     | $\alpha$ | $\beta$ | $\gamma$ | Volume |
|-----|-------|-------|-------|-------|----------|---------|----------|--------|
|     | 105   | 6.357 | 6.515 | 8.377 | 80.23    | 101.76  | 90.99    | 334.7  |
|     | 150   | 6.363 | 6.541 | 8.402 | 80.24    | 100.90  | 90.97    | 337.2  |
|     | 200   | 6.372 | 6.572 | 8.449 | 80.12    | 102.01  | 90.99    | 340.9  |
|     | 250   | 6.390 | 6.598 | 8.496 | 79.94    | 102.17  | 91.11    | 344.1  |
|     | 290   | 6.402 | 6.609 | 8.542 | 79.89    | 102.39  | 91.04    | 347.4  |

| FIII | T (K) | a     | b     | c      | $\alpha$ | $\beta$ | $\gamma$ | Volume |
|------|-------|-------|-------|--------|----------|---------|----------|--------|
|      | 100   | 6.455 | 6.383 | 16.176 | 90       | 92.04   | 90       | 666.1  |
|      | 150   | 6.471 | 6.387 | 16.227 | 90       | 91.99   | 90       | 670.3  |
|      | 200   | 6.485 | 6.398 | 16.284 | 90       | 92.04   | 90       | 675.2  |
|      | 250   | 6.499 | 6.408 | 16.355 | 90       | 92.05   | 90       | 680.6  |
|      | 300   | 6.509 | 6.419 | 16.416 | 90       | 92.08   | 90       | 685.4  |

Plots of V vs T show a good approximation to linear behavior:

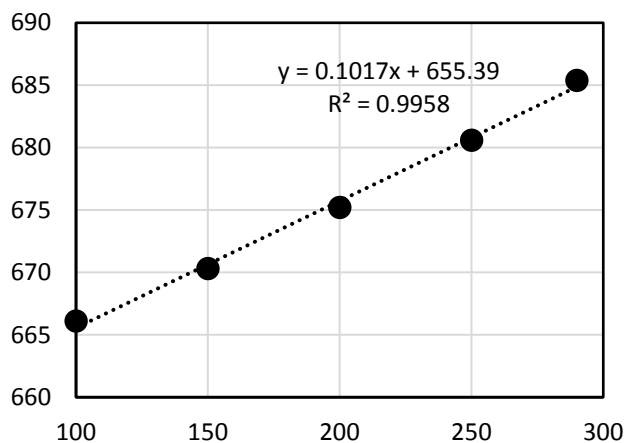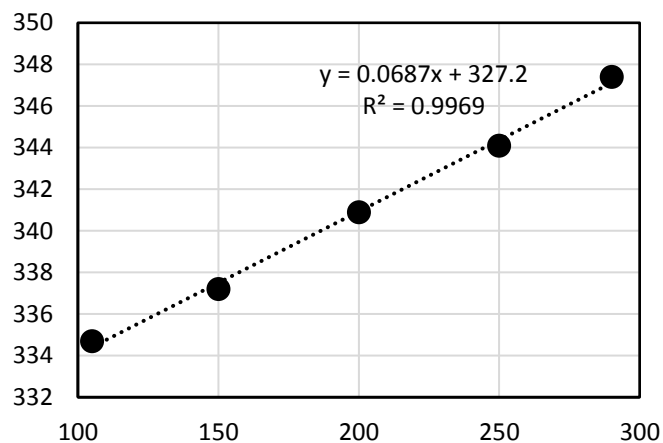

The thermal expansion tensor, principal expansion coefficients and the directions of the principal axes were obtained using the PASCAL web tool at the University of Oxford (<http://pascal.chem.ox.ac.uk/>). The core output from PASCAL is appended on the following pages.

## Output

| Axes  | $\alpha(\text{MK}^{-1})$ | $\sigma\alpha(\text{MK}^{-1})$ | Direction |         |         |
|-------|--------------------------|--------------------------------|-----------|---------|---------|
|       |                          |                                | a         | b       | c       |
| $X_1$ | 20.1426                  | 2.3792                         | 0.9430    | -0.1088 | 0.3144  |
| $X_2$ | 71.1693                  | 1.9258                         | 0.2231    | 0.8126  | -0.5383 |
| $X_3$ | 116.8383                 | 3.9956                         | 0.1424    | -0.7665 | -0.6262 |
| $V$   | 211.0011                 | 4.9554                         |           |         |         |

## Plots

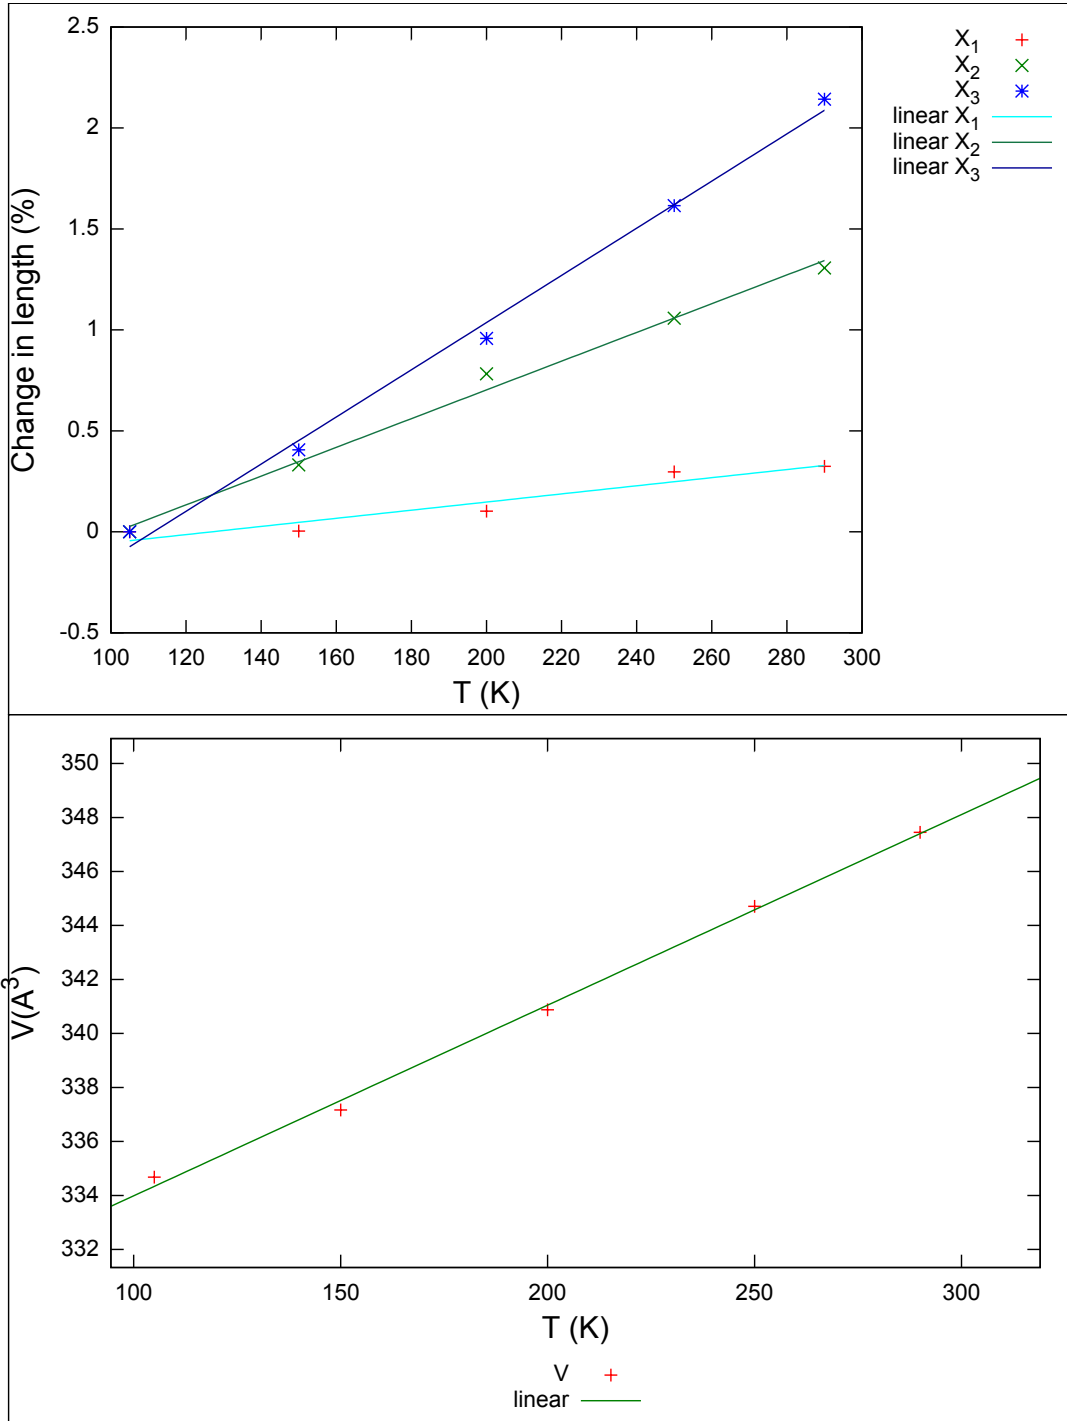

**% change in length**

| T        | X <sub>1</sub> | X <sub>2</sub> | X <sub>3</sub> | X <sub>1,calc</sub> | X <sub>2,calc</sub> | X <sub>3,calc</sub> |
|----------|----------------|----------------|----------------|---------------------|---------------------|---------------------|
| 105.0000 | 0.0000         | 0.0000         | 0.0000         | -0.0438             | 0.0269              | -0.0737             |
| 150.0000 | 0.0041         | 0.3317         | 0.4065         | 0.0469              | 0.3471              | 0.4521              |
| 200.0000 | 0.1025         | 0.7824         | 0.9578         | 0.1476              | 0.7030              | 1.0363              |
| 250.0000 | 0.2971         | 1.0585         | 1.6158         | 0.2483              | 1.0588              | 1.6205              |
| 290.0000 | 0.3242         | 1.3067         | 2.1429         | 0.3289              | 1.3435              | 2.0878              |

**Volume**

| T        | V (Å <sup>3</sup> ) | V <sub>lin</sub> (Å <sup>3</sup> ) |
|----------|---------------------|------------------------------------|
| 105.0000 | 334.6783            | 334.3387                           |
| 150.0000 | 337.1677            | 337.5165                           |
| 200.0000 | 340.8775            | 341.0474                           |
| 250.0000 | 344.7115            | 344.5782                           |
| 290.0000 | 347.4487            | 347.4029                           |

**Input**

| T   | σT | a     | b     | c     | α     | β      | γ     |
|-----|----|-------|-------|-------|-------|--------|-------|
| 105 | 5  | 6.357 | 6.515 | 8.377 | 80.23 | 101.76 | 90.99 |
| 150 | 5  | 6.363 | 6.541 | 8.402 | 80.24 | 101.90 | 90.97 |
| 200 | 5  | 6.372 | 6.572 | 8.449 | 80.12 | 102.01 | 90.99 |
| 250 | 5  | 6.390 | 6.598 | 8.496 | 79.94 | 102.17 | 91.11 |
| 290 | 5  | 6.402 | 6.609 | 8.542 | 79.89 | 102.39 | 91.04 |



# Output

| Axes     | $\alpha(\text{MK}^{-1})$ | $\sigma\alpha(\text{MK}^{-1})$ | Direction |         |         |
|----------|--------------------------|--------------------------------|-----------|---------|---------|
|          |                          |                                | a         | b       | c       |
| $X_1$    | 30.2064                  | 2.5760                         | -0.0000   | 1.0000  | -0.0000 |
| $X_2$    | 44.2187                  | 0.7220                         | -1.0000   | 0.0000  | -0.0071 |
| $X_3$    | 77.6486                  | 2.7147                         | 0.0447    | -0.0000 | 0.9990  |
| <b>V</b> | 154.0260                 | 4.7771                         |           |         |         |

## Plots

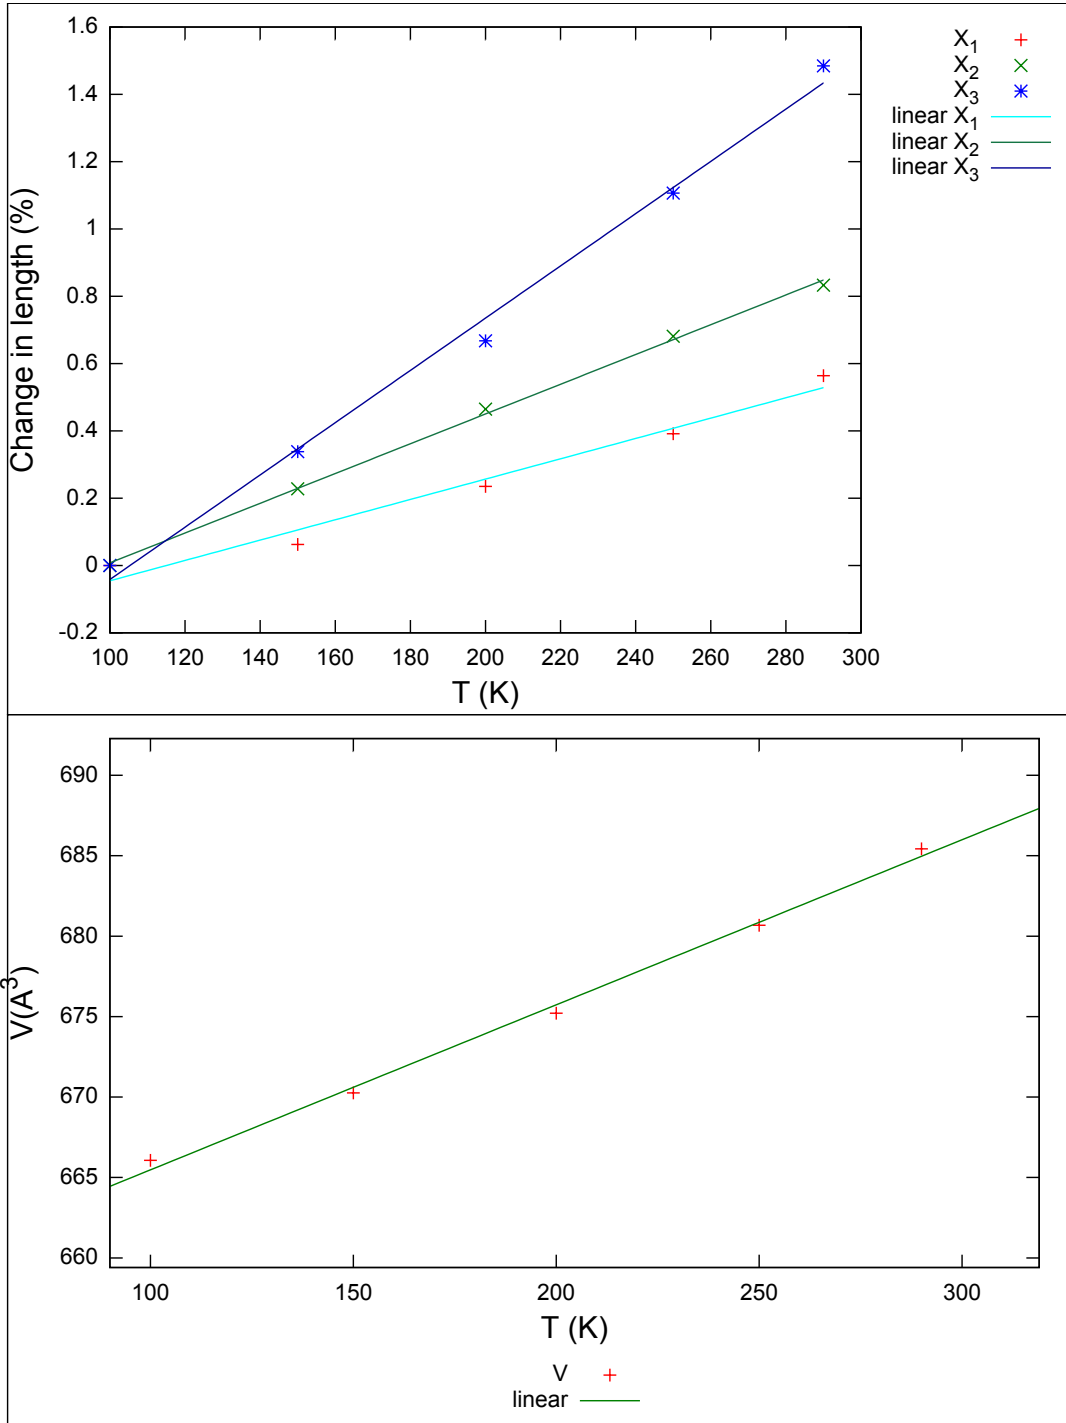

**% change in length**

| T        | X <sub>1</sub> | X <sub>2</sub> | X <sub>3</sub> | X <sub>1,calc</sub> | X <sub>2,calc</sub> | X <sub>3,calc</sub> |
|----------|----------------|----------------|----------------|---------------------|---------------------|---------------------|
| 100.0000 | 0.0000         | 0.0000         | 0.0000         | -0.0454             | 0.0080              | -0.0415             |
| 150.0000 | 0.0627         | 0.2278         | 0.3384         | 0.1057              | 0.2291              | 0.3467              |
| 200.0000 | 0.2350         | 0.4647         | 0.6677         | 0.2567              | 0.4502              | 0.7350              |
| 250.0000 | 0.3917         | 0.6810         | 1.1066         | 0.4077              | 0.6713              | 1.1232              |
| 290.0000 | 0.5640         | 0.8332         | 1.4845         | 0.5286              | 0.8482              | 1.4338              |

**Volume**

| T        | V (Å <sup>3</sup> ) | V <sub>lin</sub> (Å <sup>3</sup> ) |
|----------|---------------------|------------------------------------|
| 100.0000 | 666.0654            | 665.4753                           |
| 150.0000 | 670.2619            | 670.6049                           |
| 200.0000 | 675.2117            | 675.7344                           |
| 250.0000 | 680.6777            | 680.8640                           |
| 290.0000 | 685.4294            | 684.9677                           |

**Input**

| T   | σT | a     | b     | c      | α  | β     | γ  |
|-----|----|-------|-------|--------|----|-------|----|
| 100 | 5  | 6.455 | 6.383 | 16.176 | 90 | 92.04 | 90 |
| 150 | 5  | 6.471 | 6.387 | 16.227 | 90 | 91.99 | 90 |
| 200 | 5  | 6.485 | 6.398 | 16.284 | 90 | 92.04 | 90 |
| 250 | 5  | 6.499 | 6.408 | 16.355 | 90 | 92.05 | 90 |
| 290 | 5  | 6.509 | 6.419 | 16.416 | 90 | 92.08 | 90 |
